# Supplementary material for: Effect of a Hop Extract Standardized in 8-Prenylnaringenin on Bone Health and Gut Microbiome in Postmenopausal Women with Osteopenia: A One-Year Randomized, Double-Blind, Placebo-Controlled Trial
Source: MDPI journal article supplement (doi:10.3390/nu15122688), 2023-06-09
Supplement: s1 [file s1]

Supplementary material

# Effect of a Hop Extract Standardized in 8-Prenylnaringenin on Bone Health and Gut Microbiome in Postmenopausal Women with Osteopenia: A One-Year Randomized, Double-Blind, Placebo-Controlled Trial

(A)

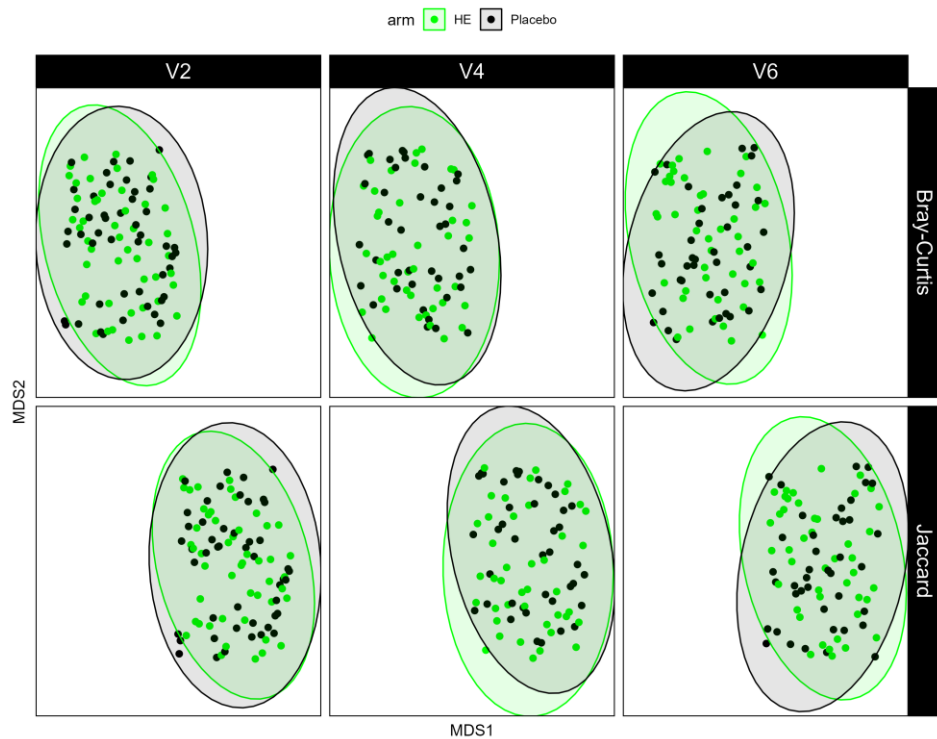

(B)

| Visit | Rank    | Bray-Curtis | Jaccard |
|-------|---------|-------------|---------|
| V2    | Family  | 0.34        | 0.38    |
|       | Genus   | 0.37        | 0.43    |
|       | Species | 0.49        | 0.55    |
| V4    | Family  | 0.44        | 0.44    |
|       | Genus   | 0.50        | 0.54    |
|       | Species | 0.57        | 0.56    |
| V6    | Family  | 0.51        | 0.51    |
|       | Genus   | 0.55        | 0.52    |
|       | Species | 0.29        | 0.27    |

**Figure S1.**  $\beta$ -diversity at baseline (V2), 24 weeks (V4), and 48 weeks (V6) in the HE and placebo group assessed by (A) low-dimensional representations of the taxonomic profiles computed using non-metric multidimensional scaling (MDS) on Bray-Curtis and Jaccard pairwise dissimilarities and (B) associated p-values from MiRKAT tests of association with treatment groups.

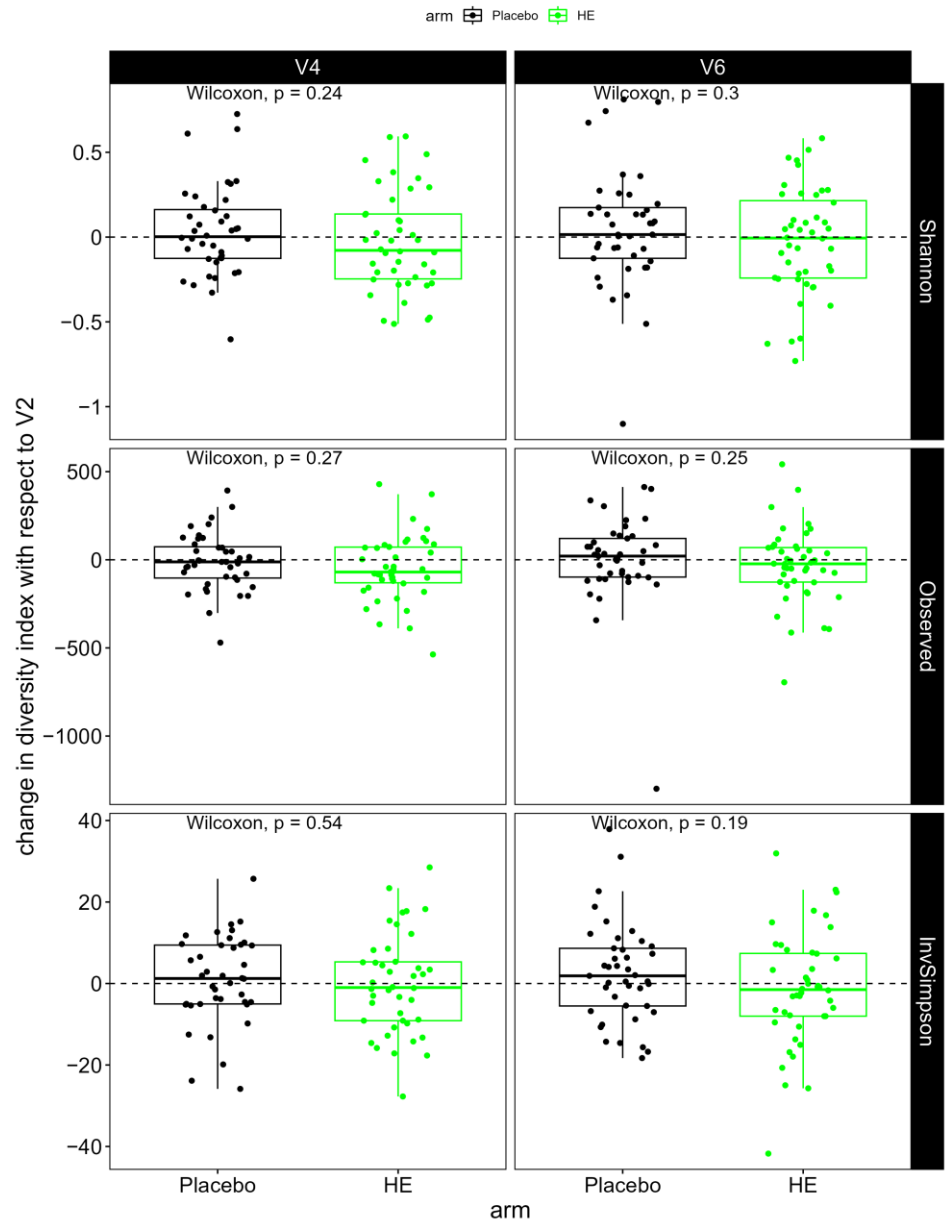

**Figure S2.** Evolution of  $\alpha$ -diversity as change from baseline after 24 weeks (V4) and 48 weeks (V6) in the HE and placebo group assessed by the Shannon index, observed number of species (Observed), and the inverse Simpson index (InvSimpson). Reported p-values are from two-sample Wilcoxon rank sum tests.

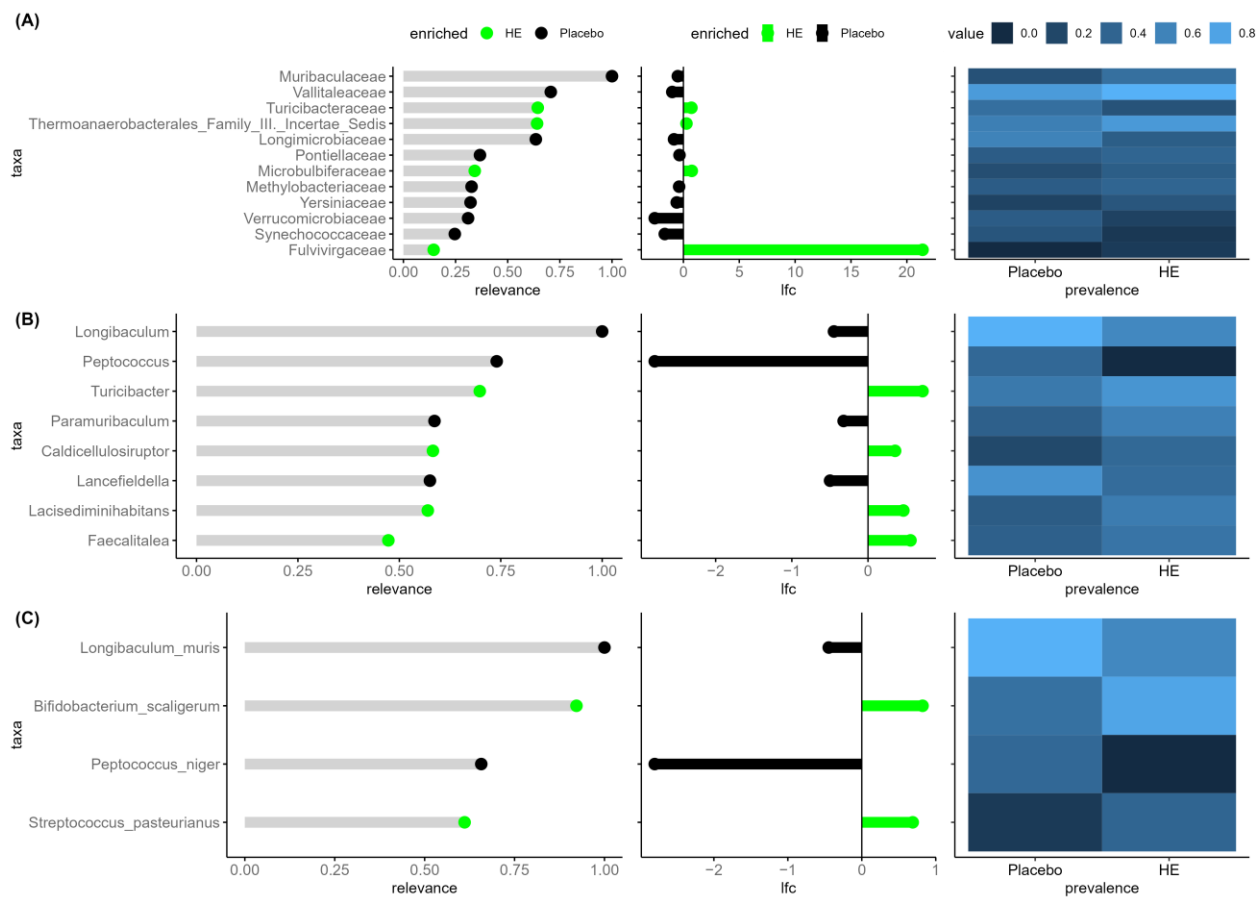

**Figure S3.** Microbiome components differentiating between HE and placebo at week 24. For each specific level (**A.** Family, **B.** Genus and **C.** Species) we displayed in the left panel the importance of each selected taxon to differentiate between the two groups, in the middle panel the effect size, by reporting the log-fold difference between the mean abundance of the taxon in each group and finally in the rightmost panel the prevalence of the selected taxa on each compared group.

(A)

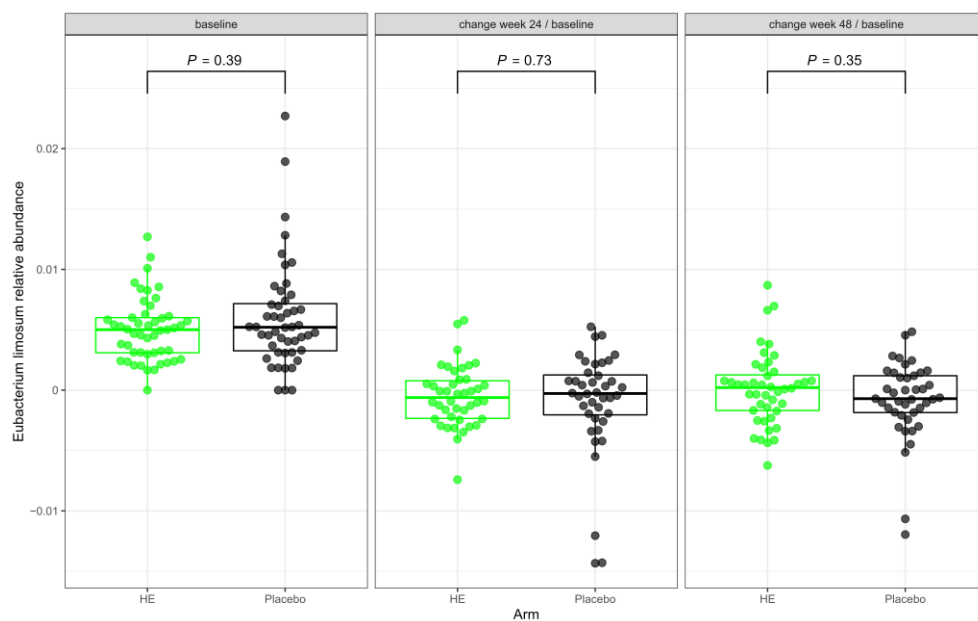

(B)

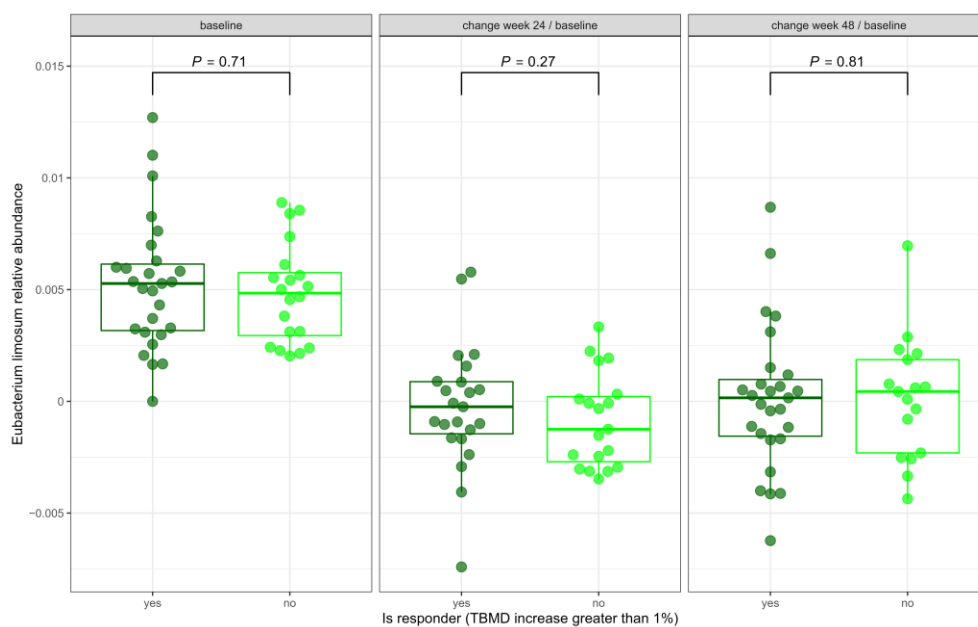

**Figure S4.** *E. limosum* relative abundance between treatment group (A) and between responders and non-responders (B). Responders are defined as women in the HE group with a total body BMD (TBMD) relative change from baseline at week 48  $\geq 1\%$ .

**Table S1.** Targeted compounds and performance of the LC-MS method: Retention Time, m/z, repeatability, linearity and limit of quantification (LOQ).

| Compound | Formula                                        | Retention Time (min) | [M - H] <sup>-</sup> | RSD % in Diluent | RSD % in Spiked Plasma | Linearity (R <sup>2</sup> ) | LOQ (ng/mL) |
|----------|------------------------------------------------|----------------------|----------------------|------------------|------------------------|-----------------------------|-------------|
| IX       | C <sub>21</sub> H <sub>22</sub> O <sub>5</sub> | 6.6                  | 353.13944            | 3.2              | 3.8                    | 0.9996                      | 0.14        |
| 8-PN     | C <sub>20</sub> H <sub>20</sub> O <sub>5</sub> | 7.4                  | 339.12379            | 3.5              | 2.5                    | 0.9997                      | 0.11        |
| 6-PN     | C <sub>20</sub> H <sub>20</sub> O <sub>5</sub> | 8.2                  | 339.12379            | 4.5              | 2.7                    | 0.9997                      | 0.1         |
| X        | C <sub>21</sub> H <sub>22</sub> O <sub>5</sub> | 8.5                  | 353.13944            | 4.7              | 3.5                    | 0.9999                      | 0.11        |

**Table S2.** Plasma and urine prenylflavonoids and their metabolites.

|                  |                    | 8-PN Total<br>(ng/mL) |                       | 6-PN Total<br>(ng/mL) |                      | X Total<br>(ng/mL) |                      | IX Total<br>(ng/mL) |                          |
|------------------|--------------------|-----------------------|-----------------------|-----------------------|----------------------|--------------------|----------------------|---------------------|--------------------------|
|                  | Statistic          | 0                     | 48                    | 0                     | 48                   | 0                  | 48                   | 0                   | 48                       |
| <b>Plasma</b>    |                    |                       |                       |                       |                      |                    |                      |                     |                          |
| HE (n = 50)      | n                  | 0                     | 38                    | 0                     | 1                    | 0                  | 30                   | 0                   | 46                       |
|                  | %                  | 0.0                   | 76.0                  | 0.0                   | 2.0                  | 0.0                | 60.0                 | 0.0                 | 92.0                     |
|                  | Median             |                       | 0.50                  |                       | 0.50                 |                    | 0.50                 |                     | 4.16                     |
|                  | (Q1; Q3)           | NA                    | (0.50; 1.21)          | NA                    | (0.50; 0.50)         | NA                 | (0.50; 0.50)         | NA                  | (2.58; 8.94)             |
| Placebo (n = 47) | %                  | 0.0                   | 1                     | 0.0                   | 2.0                  | 0.0                | 60.0                 | 0.0                 | 92.0                     |
|                  | %                  | 0.0                   | 2.1                   | 0.0                   | 0.0                  | 0.0                | 6.4                  | 0.0                 | 0.0                      |
|                  | Median             |                       | 0.50                  |                       | NA                   |                    | 0.50                 |                     | NA                       |
|                  | (Q1; Q3)           | NA                    | (0.50; 0.50)          | NA                    | NA                   | NA                 | (0.50; 0.50)         | NA                  | NA                       |
| <b>Urine</b>     |                    |                       |                       |                       |                      |                    |                      |                     |                          |
| HE (n = 50)      | n                  | 4                     | 47                    | 1                     | 46                   | 0                  | 47                   | 4                   | 47                       |
|                  | %                  | 8                     | 94                    | 2                     | 92                   | 0                  | 94                   | 8                   | 94                       |
|                  | Median<br>(Q1; Q3) | NA                    | 6.67<br>(4.16; 15.46) | NA                    | 2.46<br>(1.55; 3.86) | NA                 | 1.31<br>(0.81; 2.56) | NA                  | 86.30<br>(48.59; 131.66) |
| Placebo (n = 47) | n                  | 1                     | 0                     | 0                     | 0                    | 0                  | 0                    | 0                   | 1                        |
|                  | %                  | 2.1                   | 0.0                   | 0.0                   | 0.0                  | 0.0                | 0.0                  | 0.0                 | 2.1                      |
|                  | Median<br>(Q1; Q3) | NA                    | NA                    | NA                    | NA                   | NA                 | NA                   | NA                  | 3.80<br>(3.80; 3.80)     |

**Table S3.** Overview of adverse events on all randomized participants.

| Parameter, Units of Measure                                         |          | HE (n = 50) | Placebo (n = 50) |
|---------------------------------------------------------------------|----------|-------------|------------------|
| Number of AEs, n                                                    |          | 61          | 77               |
|                                                                     | Total *  | 55          | 72               |
| Number of TEAEs, n                                                  | Mild     | 39          | 55               |
|                                                                     | Moderate | 14          | 13               |
|                                                                     | Severe   | 2           | 4                |
| Number of subjects with TEAEs, n (%)                                |          | 30 (60.0)   | 36 (72.0)        |
| Number of subjects with serious TEAEs, n (%)                        |          | 2 (4.0)     | 2 (4.0)          |
| Number of subjects with severe TEAEs, n (%)                         |          | 2 (4.0)     | 2 (4.0)          |
| Number of subjects with mild or moderate TEAEs, n (%)               |          | 35 (70.0)   | 42 (84.0)        |
| Number of subjects with treatment related or suspected TEAEs, n (%) |          | 15 (30.0)   | 22 (44.0)        |

AE, Adverse Event; TEAE, Treatment Emergent Adverse Event; HE, Hop Extract

\* Chi-square test: *p*-value = 0.2053

**Table S4.** Blood safety parameters at baseline and 48 weeks.

| Parameters                                        | Time     | Statistics   | HE (N = 47)     | Placebo (N = 47) |
|---------------------------------------------------|----------|--------------|-----------------|------------------|
| <b>Hematology</b>                                 |          |              |                 |                  |
| White Blood Cells (10 <sup>9</sup> /L)            | Baseline | Mean (SD)    | 4.855 (1.184)   | 5.734 (1.634)    |
|                                                   | Week 48  | Mean (SD)    | 5.060 (1.205)   | 5.857 (2.002)    |
|                                                   |          | Low n (%)    | 9 (19.1%)       | 3 (6.4%)         |
|                                                   |          | Normal n (%) | 38 (80.9%)      | 42 (89.4%)       |
|                                                   |          | High n (%)   | 0               | 2 (4.3%)         |
| Red Blood Cells (10 <sup>12</sup> /L)             | Baseline | Mean (SD)    | 4.419 (0.274)   | 4.427 (0.247)    |
|                                                   | Week 48  | Mean (SD)    | 4.461 (0.269)   | 4.512 (0.273)    |
|                                                   |          | Normal n (%) | 46 (97.9%)      | 45 (95.7%)       |
|                                                   |          | High n (%)   | 1 (2.1%)        | 2 (4.3%)         |
| Haemoglobin (g/dL)                                | Baseline | Mean (SD)    | 13.40 (0.84)    | 13.34 (0.75)     |
|                                                   | Week 48  | Mean (SD)    | 13.41 (0.81)    | 13.41 (0.87)     |
|                                                   |          | Low n (%)    | 22 (46.8%)      | 22 (46.8%)       |
|                                                   |          | Normal n (%) | 25 (53.2%)      | 23 (48.9%)       |
|                                                   |          | High n (%)   | 0               | 2 (4.3%)         |
| Haematocrit (L/L)                                 | Baseline | Mean (SD)    | 0.3997 (0.0224) | 0.4001 (0.0204)  |
|                                                   | Week 48  | Mean (SD)    | 0.4066 (0.0208) | 0.4101 (0.0243)  |
|                                                   |          | Normal n (%) | 47 (100.0%)     | 45 (95.7%)       |
|                                                   |          | High n (%)   | 0               | 2 (4.3%)         |
| Mean Corpuscular Volume (fL)                      | Baseline | Mean (SD)    | 90.55 (3.79)    | 90.44 (3.04)     |
|                                                   | Week 48  | Mean (SD)    | 91.26 (3.98)    | 90.96 (3.28)     |
|                                                   |          | Low n (%)    | 1 (2.1%)        | 0                |
|                                                   |          | Normal n (%) | 44 (93.6%)      | 46 (97.9%)       |
|                                                   |          | High n (%)   | 2 (4.3%)        | 1 (2.1%)         |
| Mean Corpuscular Haemoglobin (pg)                 | Baseline | Mean (SD)    | 30.36 (1.45)    | 30.14 (0.99)     |
|                                                   | Week 48  | Mean (SD)    | 30.19 (1.53)    | 29.40 (2.45)     |
|                                                   |          | Low n (%)    | 3 (6.4%)        | 5 (10.6%)        |
|                                                   |          | Normal n (%) | 43 (91.5%)      | 42 (89.4%)       |
|                                                   |          | High n (%)   | 1 (2.1%)        | 0                |
| Mean Corpuscular Haemoglobin Concentration (g/dL) | Baseline | Mean (SD)    | 33.53 (0.83)    | 33.34 (0.87)     |
|                                                   | Week 48  | Mean (SD)    | 32.99 (0.83)    | 32.70 (0.77)     |
|                                                   |          | Low n (%)    | 4 (8.5%)        | 10 (21.3%)       |
|                                                   |          | Normal n (%) | 43 (91.5%)      | 37 (78.7%)       |
| Red Cell Distribution Width (%)                   | Baseline | Mean (SD)    | 13.07 (0.61)    | 13.06 (0.53)     |
|                                                   | Week 48  | Mean (SD)    | 13.13 (0.74)    | 12.92 (2.43)     |
|                                                   |          | Low n (%)    | 0               | 2 (4.3%)         |
|                                                   |          | Normal n (%) | 45 (95.7%)      | 42 (89.4%)       |
|                                                   |          | High n (%)   | 2 (4.3%)        | 3 (6.4%)         |
| Platelets (10 <sup>9</sup> /L)                    | Baseline | Mean (SD)    | 270.7 (52.6)    | 260.7 (48.9)     |
|                                                   | Week 48  | Mean (SD)    | 272.6 (53.1)    | 269.4 (45.0)     |
|                                                   |          | Low n (%)    | 1 (2.1%)        | 0                |
|                                                   |          | Normal n (%) | 44 (93.6%)      | 47 (100.0%)      |
|                                                   |          | High n (%)   | 2 (4.3%)        | 0                |
| Plateletcrit (%)                                  | Baseline | Mean (SD)    | 0.272 (0.047)   | 5.641 (36.865)   |
|                                                   | Week 48  | Mean (SD)    | 0.273 (0.046)   | 0.273 (0.036)    |
| Mean Platelet Volume (fL)                         | Baseline | Mean (SD)    | 10.23 (1.05)    | 10.32 (0.98)     |
|                                                   | Week 48  | Mean (SD)    | 11.89 (11.48)   | 10.28 (1.02)     |
|                                                   |          | Low n (%)    | 8 (17.0%)       | 12 (25.5%)       |
|                                                   |          | Normal n (%) | 37 (78.7%)      | 35 (74.5%)       |
|                                                   |          | High n (%)   | 2 (4.3%)        | 0                |

| Parameters                        | Time     | Statistics    | HE (N = 47)   | Placebo (N = 47) |
|-----------------------------------|----------|---------------|---------------|------------------|
| <b>Biochemistry</b>               |          |               |               |                  |
| Sodium (mmol/L)                   | Baseline | Mean (SD)     | 139.1 (2.2)   | 139.5 (2.2)      |
|                                   | Week 48  | Mean (SD)     | 138.9 (2.1)   | 139.4 (2.0)      |
|                                   |          | Low, n (%)    | 2 (4.3%)      | 2 (4.3%)         |
|                                   |          | Normal, n (%) | 45 (95.7%)    | 45 (95.7%)       |
| Potassium (mmol/L)                | Baseline | Mean (SD)     | 4.54 (0.60)   | 4.48 (0.36)      |
|                                   | Week 48  | Mean (SD)     | 4.35 (0.25)   | 4.31 (0.24)      |
|                                   |          | Normal, n (%) | 47 (100.0%)   | 47 (100.0%)      |
| Chloride (mmol/L)                 | Baseline | Mean (SD)     | 103.1 (2.3)   | 104.0 (2.4)      |
|                                   | Week 48  | Mean (SD)     | 103.0 (2.6)   | 103.7 (1.9)      |
|                                   |          | Low n (%)     | 2 (4.3%)      | 0                |
|                                   |          | Normal n (%)  | 45 (95.7%)    | 46 (97.9%)       |
|                                   |          | High n (%)    | 0             | 1 (2.1%)         |
| Calcium (mmol/L)                  | Baseline | Mean (SD)     | 2.425 (0.099) | 2.392 (0.087)    |
|                                   | Week 48  | Mean (SD)     | 2.405 (0.108) | 2.395 (0.095)    |
|                                   |          | Normal n (%)  | 45 (95.7%)    | 46 (97.9%)       |
|                                   |          | High n (%)    | 2 (4.3%)      | 1 (2.1%)         |
| Inorganic Phosphorus (mmol/L)     | Baseline | Mean (SD)     | 1.179 (0.115) | 1.191 (0.115)    |
|                                   | Week 48  | Mean (SD)     | 1.170 (0.123) | 1.199 (0.103)    |
|                                   |          | Normal n (%)  | 46 (97.9%)    | 45 (95.7%)       |
|                                   |          | High n (%)    | 1 (2.1%)      | 2 (4.3%)         |
| Magnesium (mmol/L)                | Baseline | Mean (SD)     | 0.823 (0.051) | 0.848 (0.049)    |
|                                   | Week 48  | Mean (SD)     | 0.804 (0.055) | 0.831 (0.056)    |
|                                   |          | Normal n (%)  | 47 (100.0%)   | 47 (100.0%)      |
| Uric Acid (umol/L)                | Baseline | Mean (SD)     | 256.6 (54.4)  | 266.7 (51.5)     |
|                                   | Week 48  | Mean (SD)     | 270.9 (59.8)  | 283.7 (61.8)     |
|                                   |          | Normal n (%)  | 46 (97.9%)    | 44 (93.6%)       |
|                                   |          | High n (%)    | 1 (2.1%)      | 3 (6.4%)         |
| Urea (mmol/L)                     | Baseline | Mean (SD)     | 4.72 (1.07)   | 5.46 (1.09)      |
|                                   | Week 48  | Mean (SD)     | 4.84 (1.04)   | 5.48 (1.20)      |
|                                   |          | Normal n (%)  | 47 (100.0%)   | 45 (95.7%)       |
|                                   |          | High n (%)    | 0             | 2 (4.3%)         |
| Creatinine (umol/L)               | Baseline | Mean (SD)     | 66.7 (5.8)    | 68.7 (7.8)       |
|                                   | Week 48  | Mean (SD)     | 68.6 (8.0)    | 71.0 (10.9)      |
|                                   |          | Normal n (%)  | 46 (97.9%)    | 44 (93.6%)       |
|                                   |          | High n (%)    | 1 (2.1%)      | 3 (6.4%)         |
| Total Bilirubin (umol/L)          | Baseline | Mean (SD)     | 10.33 (3.89)  | 10.06 (3.91)     |
|                                   | Week 48  | Mean (SD)     | 9.79 (3.96)   | 10.19 (3.74)     |
|                                   |          | Normal n (%)  | 46 (97.9%)    | 46 (97.9%)       |
|                                   |          | High n (%)    | 1 (2.1%)      | 1 (2.1%)         |
| Alkaline Phosphatase (IU/L)       | Baseline | Mean (SD)     | 70.9 (16.6)   | 76.8 (18.7)      |
|                                   | Week 48  | Mean (SD)     | 72.5 (15.7)   | 77.2 (18.8)      |
|                                   |          | Low n (%)     | 1 (2.1%)      | 0                |
|                                   |          | Normal n (%)  | 46 (97.9%)    | 47 (100.0%)      |
| Aspartate Aminotransferase (IU/L) | Baseline | Mean (SD)     | 23.4 (4.9)    | 21.8 (6.7)       |
|                                   | Week 48  | Mean (SD)     | 23.3 (4.9)    | 22.0 (8.9)       |
|                                   |          | Normal n (%)  | 47 (100.0%)   | 45 (95.7%)       |
|                                   |          | High n (%)    | 0             | 2 (4.3%)         |
| Alanine Aminotransferase (IU/L)   | Baseline | Mean (SD)     | 21.0 (9.3)    | 19.8 (8.0)       |
|                                   | Week 48  | Mean (SD)     | 20.8 (7.3)    | 20.3 (12.1)      |
|                                   |          | Normal n (%)  | 47 (100.0%)   | 46 (97.9%)       |

| Parameters                        | Time     | Statistics   | HE (N = 47) | Placebo (N = 47) |
|-----------------------------------|----------|--------------|-------------|------------------|
|                                   |          | High n (%)   | 0           | 1 (2.1%)         |
| Gamma-Glutamyl Transferase (IU/L) | Baseline | Mean (SD)    | 24.0 (15.8) | 23.4 (16.2)      |
|                                   | Week 48  | Mean (SD)    | 24.0 (15.8) | 20.9 (13.7)      |
|                                   |          | Low n (%)    | 0           | 2 (4.3%)         |
|                                   |          | Normal n (%) | 39 (83.0%)  | 42 (89.4%)       |
|                                   |          | High n (%)   | 8 (17.0%)   | 3 (6.4%)         |
| Total Proteins (g/L)              | Baseline | Mean (SD)    | 71.0 (4.8)  | 69.5 (3.4)       |
|                                   | Week 48  | Mean (SD)    | 71.2 (4.2)  | 69.9 (3.5)       |
|                                   |          | Low n (%)    | 0           | 1 (2.1%)         |
|                                   |          | Normal n (%) | 46 (97.9%)  | 46 (97.9%)       |
|                                   |          | High n (%)   | 1 (2.1%)    | 0                |
| Albumin (g/L)                     | Baseline | Mean (SD)    | 44.7 (2.3)  | 43.4 (2.0)       |
|                                   | Week 48  | Mean (SD)    | 45.1 (2.2)  | 44.3 (1.7)       |
|                                   |          | Normal n (%) | 47 (100.0%) | 47 (100.0%)      |
| Albumin/Globulin Ratio            | Baseline | Mean (SD)    | 1.74 (0.24) | 1.69 (0.18)      |
|                                   | Week 48  | Mean (SD)    | 1.76 (0.25) | 1.75 (0.18)      |
|                                   |          | Normal n (%) | 43 (91.5%)  | 45 (95.7%)       |
|                                   |          | High n (%)   | 4 (8.5%)    | 2 (4.3%)         |
| Globulin (g/L)                    | Baseline | Mean (SD)    | 26.2 (4.0)  | 26.1 (2.6)       |
|                                   | Week 48  | Mean (SD)    | 26.1 (4.0)  | 25.6 (2.7)       |
|                                   |          | Low n (%)    | 1 (2.1%)    | 0                |
|                                   |          | Normal n (%) | 45 (95.7%)  | 47 (100.0%)      |
|                                   |          | High n (%)   | 1 (2.1%)    | 0                |

**Table S5.** Plasma bone biomarkers at 48 weeks (change from baseline).

| Parameter     | Unit   | Statistics      | HE (n = 46)                | Placebo (n = 47)          | p    |
|---------------|--------|-----------------|----------------------------|---------------------------|------|
| CTx           | ng/ml  | median (Q1; Q3) | 0.037 (−0.009 ; 0.165) *** | 0.071 (0.005 ; 0.164) *** | 0.55 |
| PINP          | pg/ml  | mean (SD)       | 360.6 (7680.0)             | −1199.0 (7804.8)          | 0.25 |
| Oc            | pg/ml  | mean (SD)       | 115.7 (7634.7)             | 183.1 (9067.6)            | 0.23 |
| uOc           | pg/ml  | mean (SD)       | −300.5 (1169.2)**          | −281.8 (1376.4)           | 0.22 |
| Sclerostin    | pg/ml  | mean (SD)       | −78.0 (342.4)*             | −110.8 (299.5)*           | 0.81 |
| BALP          | ng/ml  | median (Q1; Q3) | −0.135 (−1.035; 0.318)     | −0.001 (−0.454; 0.618)    | 0.16 |
| TRAP5b        | mIU/ml | median (Q1; Q3) | −0.105 (−0.229 ; 0.025) ** | −0.079 (−0.281 ; 0.013) * | 0.50 |
| BALP / TRAP5b | ng/mIU | median (Q1; Q3) | 0.304 (−1.816 ; 3.060)     | 1.146 (−0.759 ; 2.582) *  | 0.59 |

\* $p < 0.05$ , \*\*  $p < 0.01$ , \*\*\*  $p < 0.001$  versus baseline



**Table S6.** Anthropometrics and blood efficacy parameters at 48 weeks (change from baseline).

| Parameter            | Unit              | Statistics      | n  | HE                    | n  | Placebo               | p                  |
|----------------------|-------------------|-----------------|----|-----------------------|----|-----------------------|--------------------|
| Weight               | kg                | median (Q1; Q3) | 47 | 0.50 (-0.70; 2.10)    | 47 | 0.40 (-1.50; 1.30)    | 0.137 <sup>2</sup> |
| BMI                  | kg/m <sup>2</sup> | median (Q1; Q3) | 47 | 0.24 (-0.19; 0.82)    | 47 | 0.10 (-0.53; 0.51)    | 0.179 <sup>2</sup> |
| Waist circumference  | cm                | median (Q1; Q3) | 47 | 0.0 (0.0; 1.0)        | 47 | 0.0 (0.0; 1.0)        | 0.125 <sup>3</sup> |
| Hip circumference    | cm                | median (Q1; Q3) | 47 | 0.0 (0.0; 1.0)        | 47 | 0.0 (-1.0; 1.0)       | 0.143 <sup>3</sup> |
| Waist-to-hip ratio   | a.u.              | mean (SD)       | 47 | 0.001 (0.012)         | 47 | 0.001 (0.013)         | 0.972 <sup>1</sup> |
| Total Cholesterol    | mmol/L            | mean (SD)       | 46 | 0.08 (0.56)           | 45 | 0.16 (0.60)           | 0.510 <sup>1</sup> |
| LDL-Cholesterol      | mmol/L            | median (Q1; Q3) | 46 | -0.05 (-0.40; 0.30)   | 45 | 0.20 (-0.30 ; 0.40)   | 0.102 <sup>3</sup> |
| HDL-Cholesterol      | mmol/L            | median (Q1; Q3) | 46 | 0.03 (-0.080; 0.150)  | 45 | 0.11 (0.020; 0.220)   | 0.170 <sup>2</sup> |
| Triglycerides        | mmol/L            | median (Q1; Q3) | 46 | 0.045 (-0.090; 0.220) | 45 | 0.01 (-0.240; 0.150)  | 0.770 <sup>2</sup> |
| Fasting Glucose      | mmol/L            | mean (SD)       | 45 | 0.04 (0.38)           | 44 | 0.04 (0.41)           | 0.956 <sup>1</sup> |
| Fasting Insulinaemia | mIU/L             | median (Q1; Q3) | 46 | 0.085 (-0.800; 1.300) | 44 | 0.085 (-1.040; 1.160) | 0.742 <sup>2</sup> |
| HbA1c                | mmol/mol          | mean (SD)       | 46 | -0.9 (1.6)            | 44 | -1.1 (2.2)            | 0.943 <sup>1</sup> |
| HOMA-IR              | a.u.              | median (Q1; Q3) | 45 | 0.08 (-0.16 ; 0.31)   | 44 | 0.02 (-0.23 ; 0.33)   | 0.753 <sup>2</sup> |
| 17-β Oestradiol      | pmol/L            | median (Q1; Q3) | 47 | 0.0 (0.0 ; 0.0)       | 46 | 0.0 (0.0 ; 0.0)       | 0.872 <sup>3</sup> |
| Serum 25-OH D3       | nmol/L            | median (Q1; Q3) | 47 | 20.0 (2.0; 29.0)      | 45 | 22.0 (6.0; 36.0)      | 0.254 <sup>3</sup> |

<sup>1</sup>MMRM including analysis group, baseline value, visit and interaction group \* visit with unstructured matrix of variance-covariance; <sup>2</sup>MMRM on logtransformed values including analysis group, baseline value, visit and interaction group \* visit with unstructured matrix of variance-covariance; <sup>3</sup>Rank ANCOVA at each timepoint including analysis group and baseline value.

**Table S7.** Dietary intake and physical activity at 48 weeks (change from baseline).

| Parameter         |              | Unit   | Statistics      | HE (n = 47)          | Placebo (n = 47)       | <i>p</i>           |
|-------------------|--------------|--------|-----------------|----------------------|------------------------|--------------------|
| Dietary Intake    | Energy       | kcal/d | median (Q1; Q3) | 50.3 (−268.5; 430.6) | 47.8 (−452.5; 297.0)   | 0.215 <sup>1</sup> |
|                   | Fat          | g/d    | median (Q1; Q3) | 3.6 (−9.9; 26.2)     | −7.3 (−21.8; 7.1)      | 0.048              |
|                   | Carbohydrate | g/d    | mean (SD)       | 17.2 (79.3)          | 2.5 (66.5)             | 0.246 <sup>3</sup> |
|                   | Protein      | g/d    | median (Q1; Q3) | −3.0 (−12.2; 19.8)   | −2.6 (−20.0; 14.3)     | 0.299 <sup>1</sup> |
|                   | Fibre        | g/d    | mean (SD)       | 3.4 (10.9)           | 1.2 (8.8)              | 0.165 <sup>3</sup> |
|                   | Isoflavone   | µg/d   | median (Q1; Q3) | −7.0 (−34.8; 50.6)   | 1.2 (−25.4; 11.6)      | 0.101 <sup>2</sup> |
|                   | Calcium      | mg/d   | median (Q1; Q3) | 5.9 (−224.1; 469.2)  | −105.8 (−296.3; 131.9) | 0.040 <sup>2</sup> |
|                   | Magnesium    | mg/d   | median (Q1; Q3) | 11.0 (−52.1; 99.4)   | 7.1 (−76.9; 55.4)      | 0.422 <sup>1</sup> |
|                   | Phosphorus   | mg/d   | median (Q1; Q3) | 37.9 (−295.9; 395.1) | −110.4 (−376.4; 230.6) | 0.105 <sup>1</sup> |
|                   | Potassium    | mg/d   | median (Q1; Q3) | 59.3 (−541; 882.6)   | −3.8 (−577.9; 882.1)   | 0.659 <sup>1</sup> |
|                   | Sodium       | mg/d   | mean (SD)       | 174.9 (656.3)        | −0.1 (640.3)           | 0.080 <sup>3</sup> |
|                   | Vitamin D    | µg/d   | median (Q1; Q3) | −0.2 (−1.5; 0.9)     | −0.4 (−2.0; 0.2)       | 0.442 <sup>2</sup> |
|                   | Vitamin K1   | µg/d   | median (Q1; Q3) | 20.6 (−19.8; 79.4)   | 11.8 (−17.3; 53.5)     | 0.343 <sup>1</sup> |
|                   | Vitamin K2   | µg/d   | median (Q1; Q3) | 1.9 (−2.5; 4.6)      | −0.4 (−4.5; 2.1)       | 0.015 <sup>1</sup> |
| Physical activity | Total PASE   | a.u.   | mean (SD)       | −1.7 (56.1)          | −19.5 (68.5)           | 0.563 <sup>4</sup> |

<sup>1</sup>Rank ANCOVA at each timepoint including analysis group and baseline value; <sup>2</sup>ANCOVA on log-transformed values including analysis group and baseline value; <sup>3</sup>ANCOVA including analysis group and baseline value; <sup>4</sup>MMRM including analysis group, baseline value, visit and interaction group\*visit with unstructured matrix of variance-covariance.

**Table S8.** SCFA concentrations at 24 weeks and 48 weeks (change from baseline).

| SCFA, in $\mu\text{mol/g}$ of<br>dry weight fecal matter | statistics | HE              |                 | Placebo         |                 |
|----------------------------------------------------------|------------|-----------------|-----------------|-----------------|-----------------|
|                                                          |            | $\Delta$ 24 wks | $\Delta$ 48 wks | $\Delta$ 24 wks | $\Delta$ 48 wks |
| acetate                                                  | median     | 4.3             | 9.9             | 19.3            | 23.8            |
|                                                          | Q1         | -22.4           | -20.6           | -0.8            | 5.5             |
|                                                          | Q3         | 35.5            | 38.2            | 28.0            | 44.2            |
| Propionate                                               | median     | 1.2             | 2.5             | 2.2             | 5.0             |
|                                                          | Q1         | -8.8            | -6.7            | -3.2            | 0.5             |
|                                                          | Q3         | 9.0             | 10.5            | 9.4             | 13.8            |
| Butyrate                                                 | median     | 0.0             | 8.9             | 3.8             | 2.1             |
|                                                          | Q1         | -8.9            | -13.6           | -2.2            | -7.7            |
|                                                          | Q3         | 14.6            | 18.1            | 16.2            | 21.7            |
| Valerate                                                 | median     | 0.0             | 2.3             | 3.1             | 2.4             |
|                                                          | Q1         | -5.5            | -5.2            | -1.5            | -3.1            |
|                                                          | Q3         | 7.1             | 8.5             | 15.8            | 9.4             |
| Isobutyrate                                              | median     | 0.6             | 0.0             | 0.3             | 0.9             |
|                                                          | Q1         | -1.4            | -1.9            | -0.8            | -0.4            |
|                                                          | Q3         | 2.8             | 2.8             | 3.7             | 4.5             |
| Isovalerate                                              | median     | 1.8             | 0.5             | 0.8             | 2.4             |
|                                                          | Q1         | -3.2            | -2.4            | -1.4            | -1.1            |
|                                                          | Q3         | 6.2             | 5.9             | 7.5             | 8.9             |
| Caproate                                                 | median     | 1.1             | 1.2             | 4.5             | 1.7             |
|                                                          | Q1         | -1.2            | -2.7            | 0.0             | -1.7            |
|                                                          | Q3         | 4.9             | 4.8             | 7.7             | 3.9             |
| Isocaproate                                              | median     | 0.0             | 0.0             | 0.0             | 0.0             |
|                                                          | Q1         | 0.0             | 0.0             | 0.0             | 0.0             |
|                                                          | Q3         | 1.0             | 0.3             | 1.2             | 0.0             |
| Total SCFA                                               | median     | 11.23           | 25.4            | 27.2            | 36.5            |
|                                                          | Q1         | -46.4           | -38.6           | 0.0             | 0.0             |
|                                                          | Q3         | 68.4            | 71.0            | 78.2            | 92.0            |
